# Supplementary material for: Large bubble drives circular DNA melting
Source: Royal Society of Chemistry journal article supplement (doi:10.1039/d4cp01536c), 2024-01-01

# Basepair Opening $r_1, r_2, r_3$ Correlation Map

## 18bp Circular

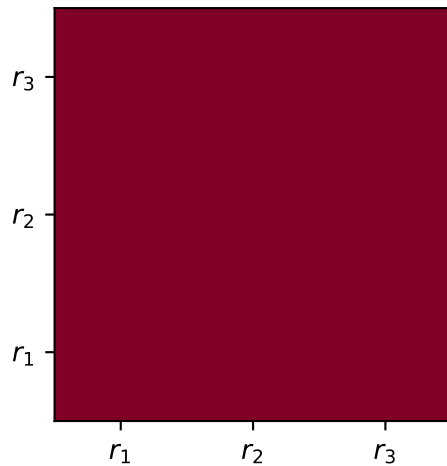

## 36bp Circular

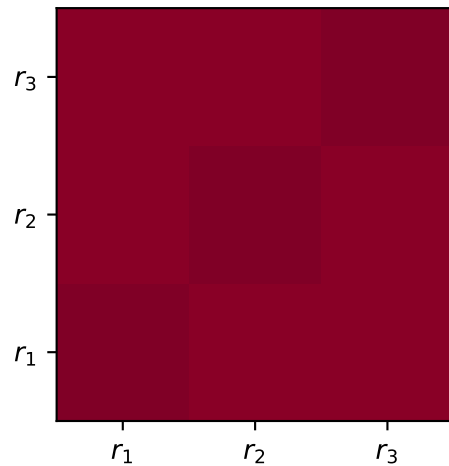

## 72bp Circular

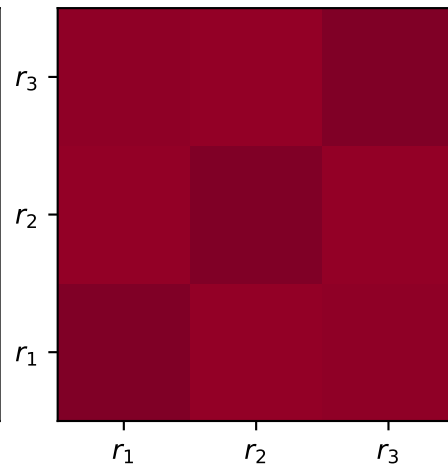

## 144bp Circular

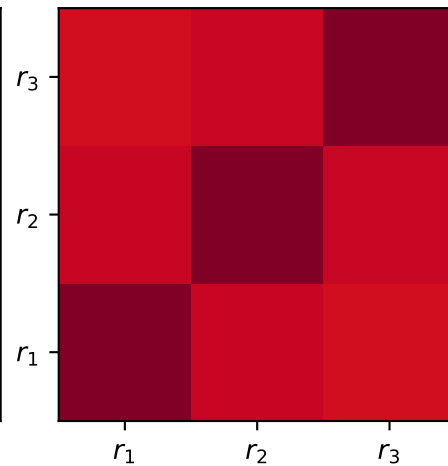

## 18bp Linear

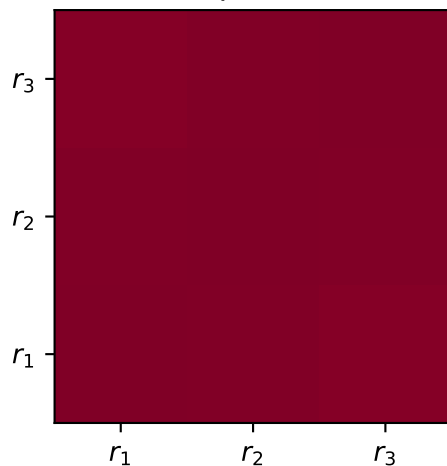

## 36bp Linear

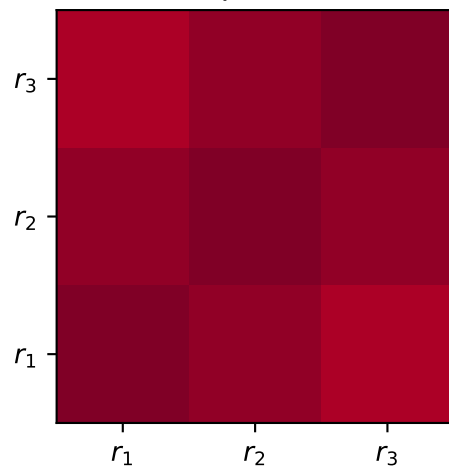

## 72bp Linear

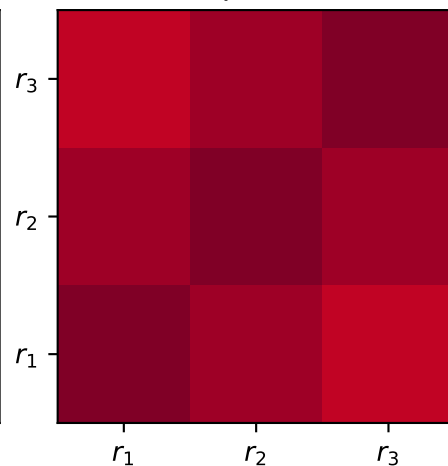

## 144bp Linear

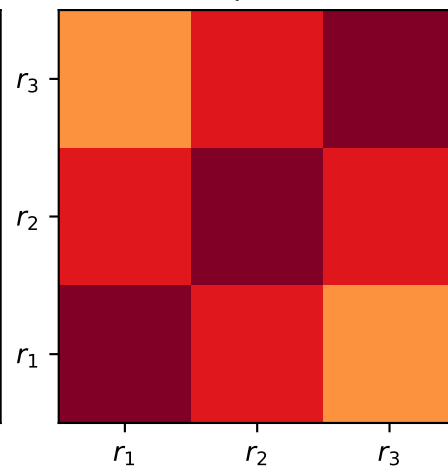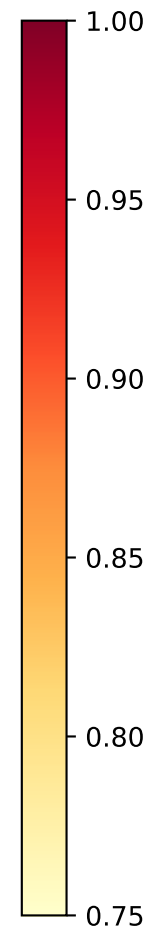

Supplement: d4cp01536c1.zip [file d4cp01536c1.zip]
