# Supplementary figures and images for: Large bubble drives circular DNA melting
Source: Royal Society of Chemistry journal article supplement (doi:10.1039/d4cp01536c), 2024-01-01

Stable Opening Length (SOL)

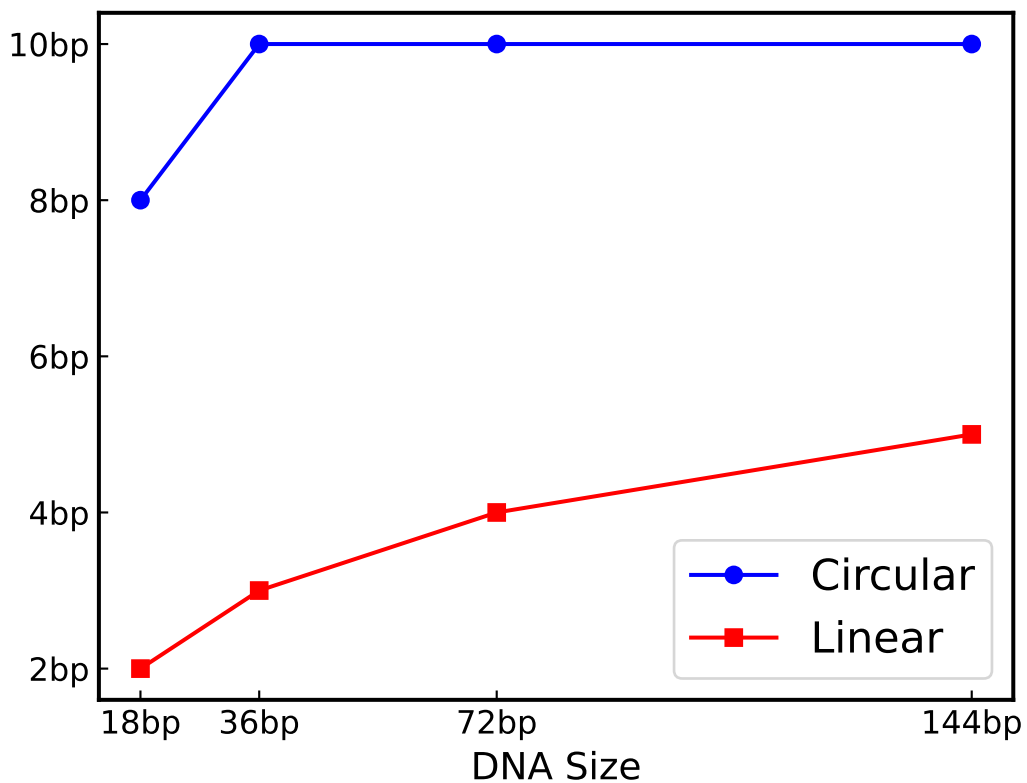

SOL as Fraction of Total Length

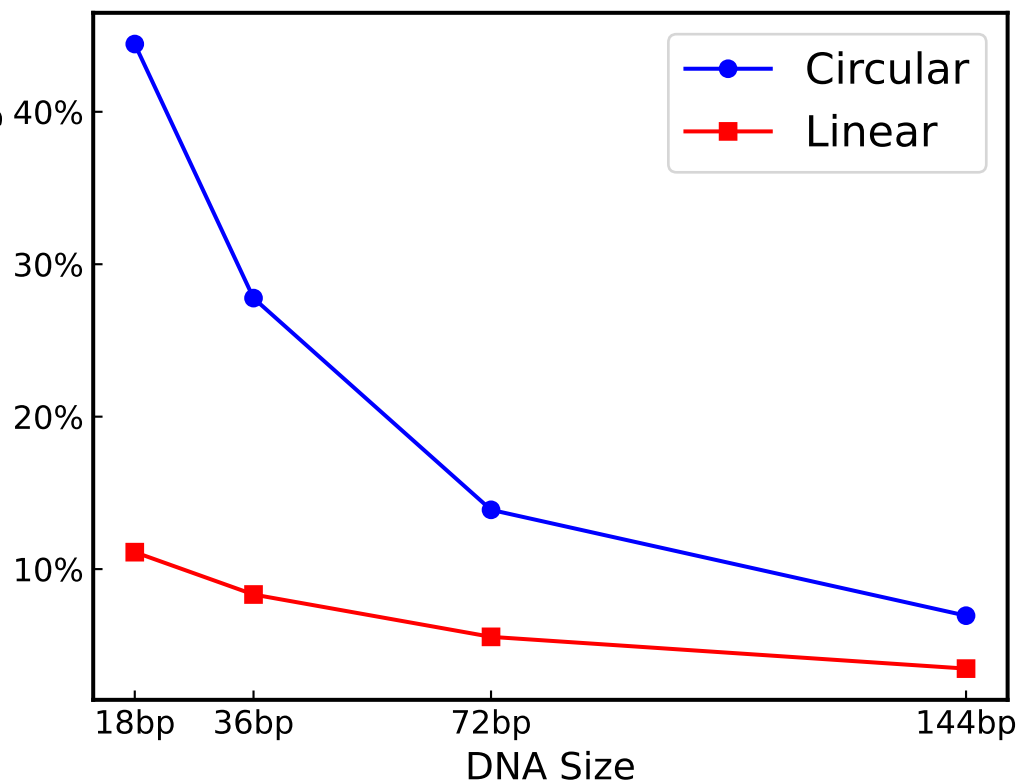

Supplement: d4cp01536c1.zip [file d4cp01536c1.zip]

Circular 18bp

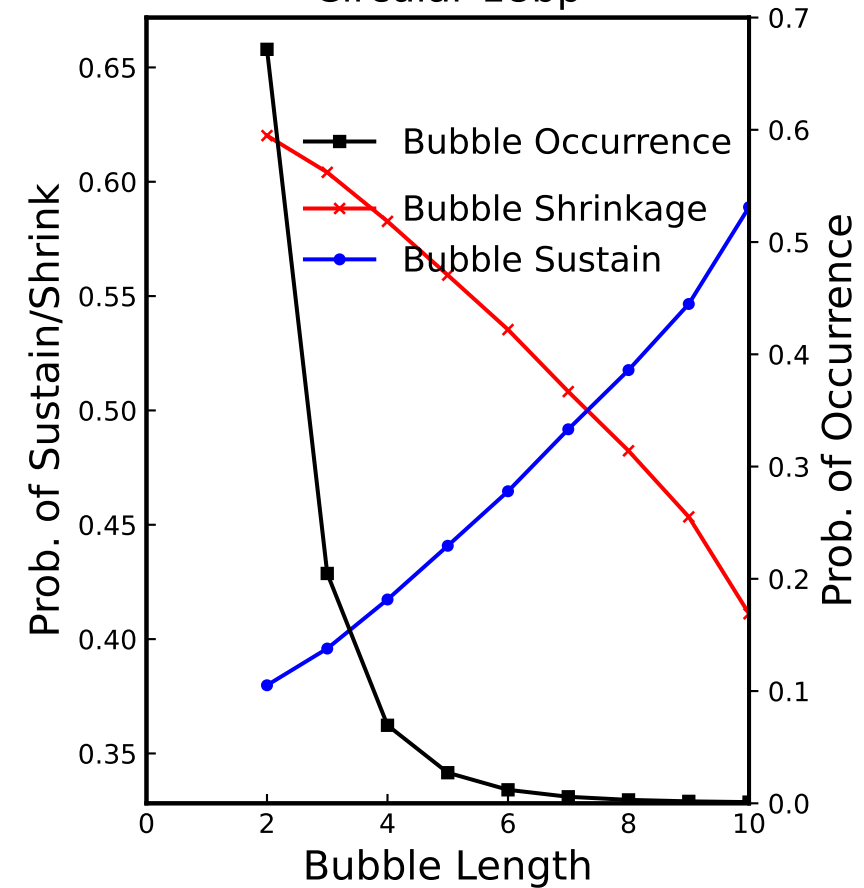

Circular 36bp

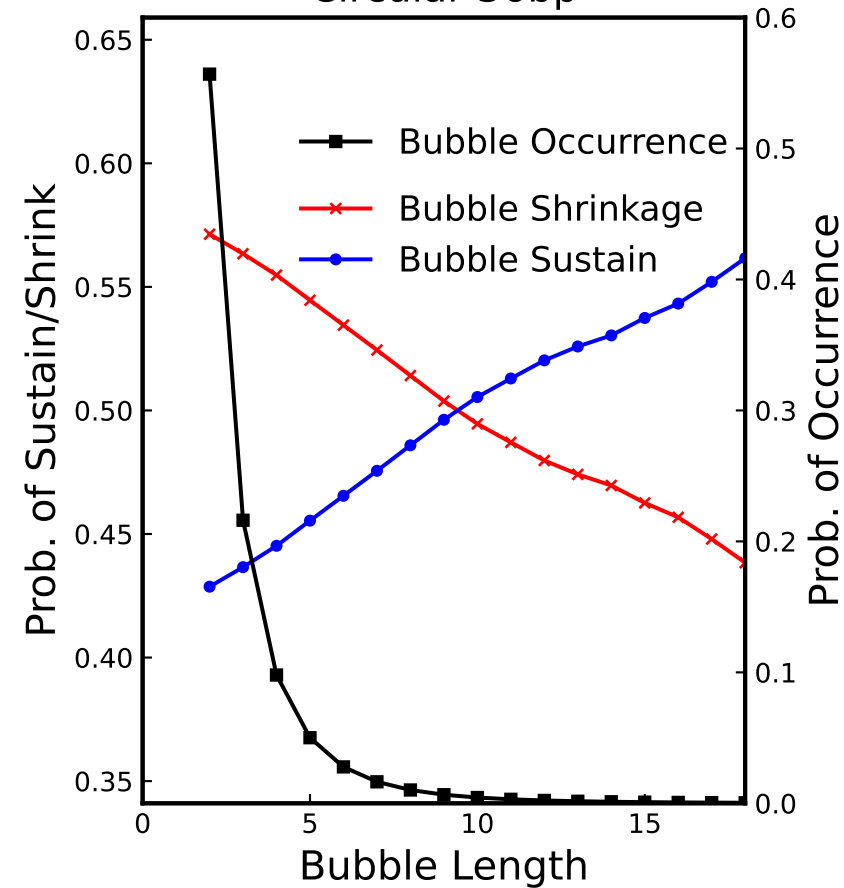

Circular 72bp

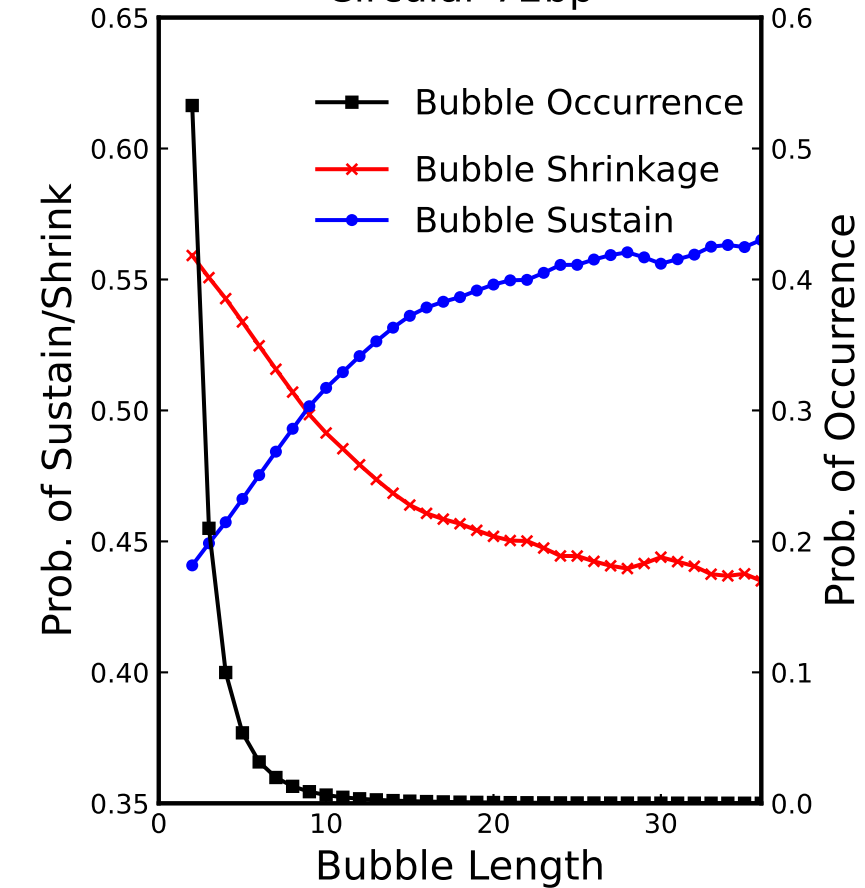

Circular 144bp

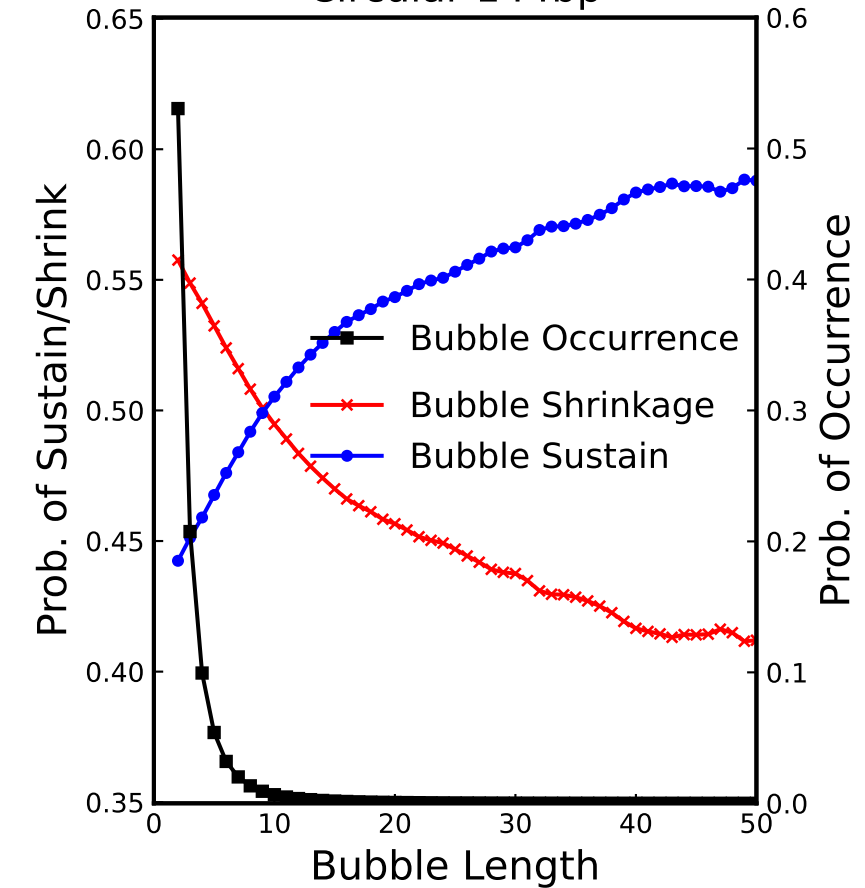

Linear 18bp

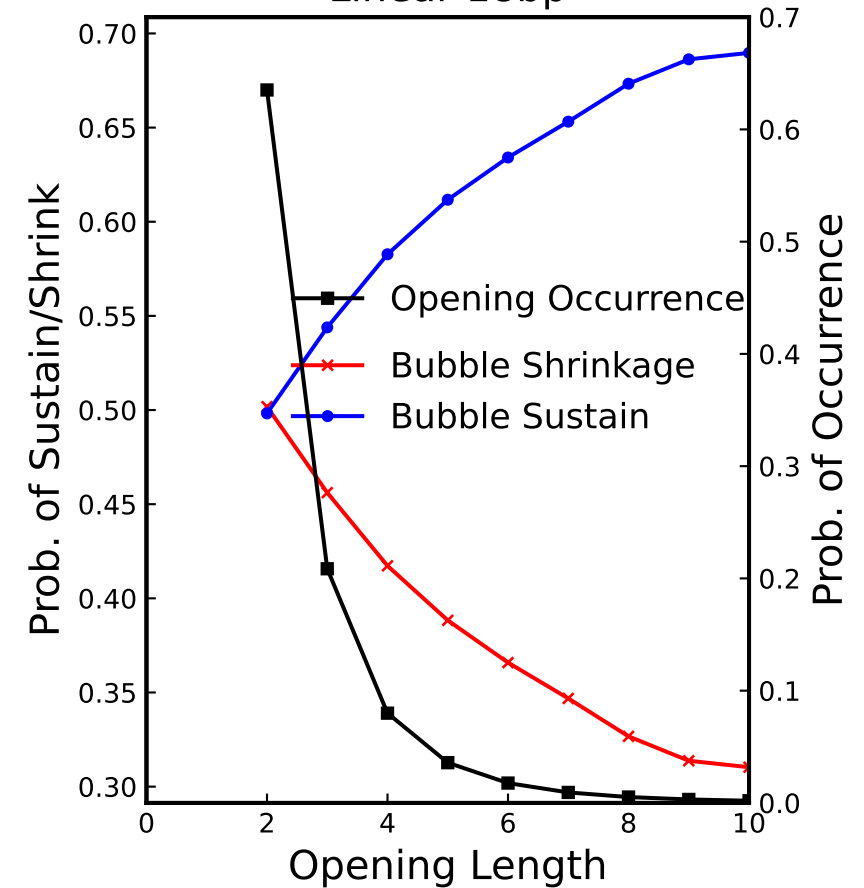

Linear 36bp

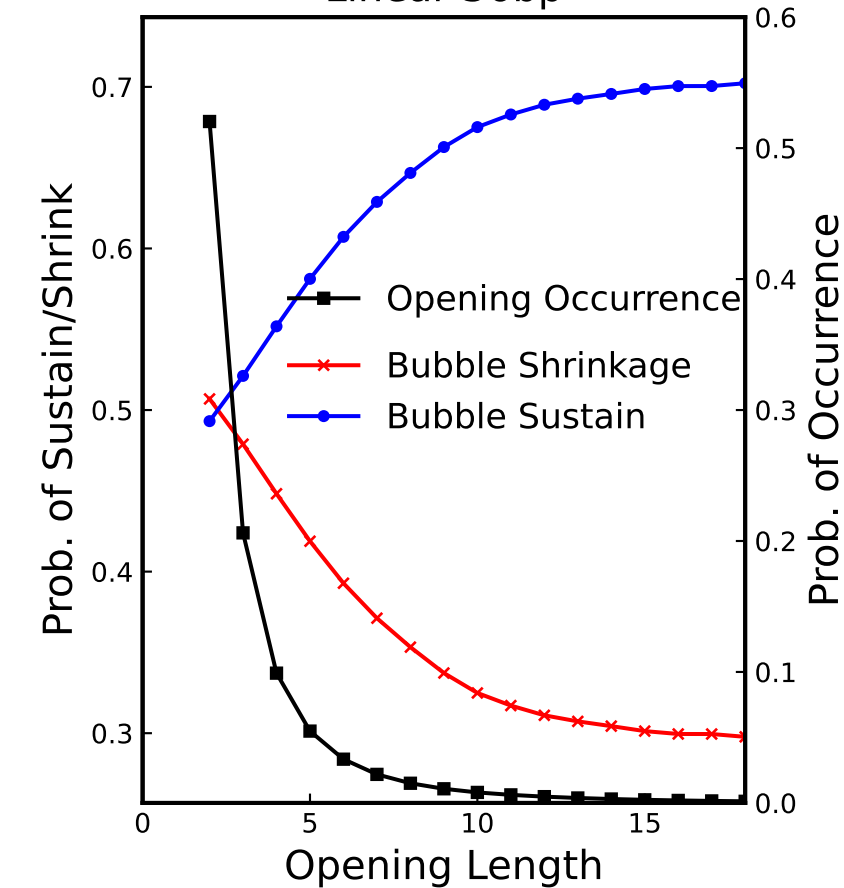

Linear 72bp

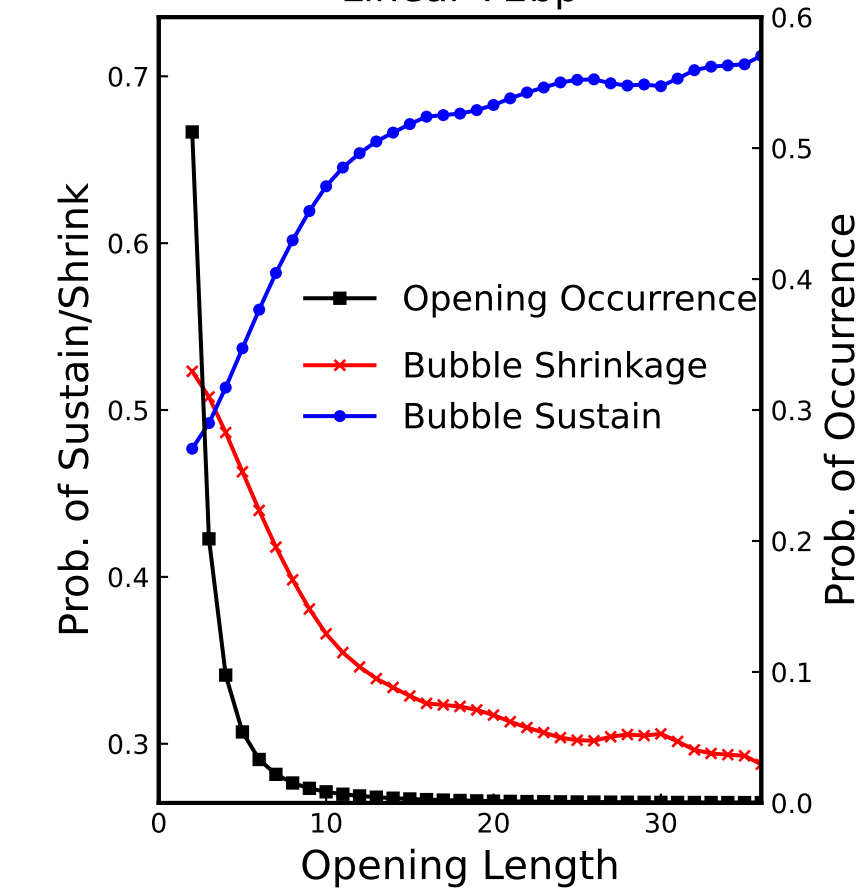

Linear 144bp

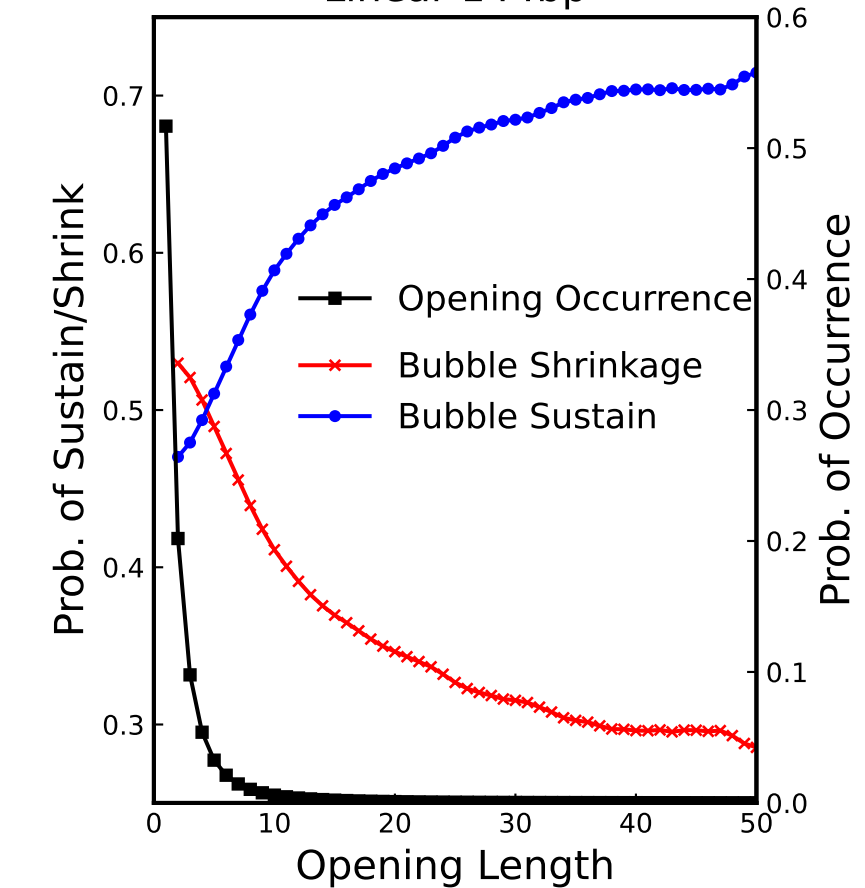

Supplement: d4cp01536c1.zip [file d4cp01536c1.zip]

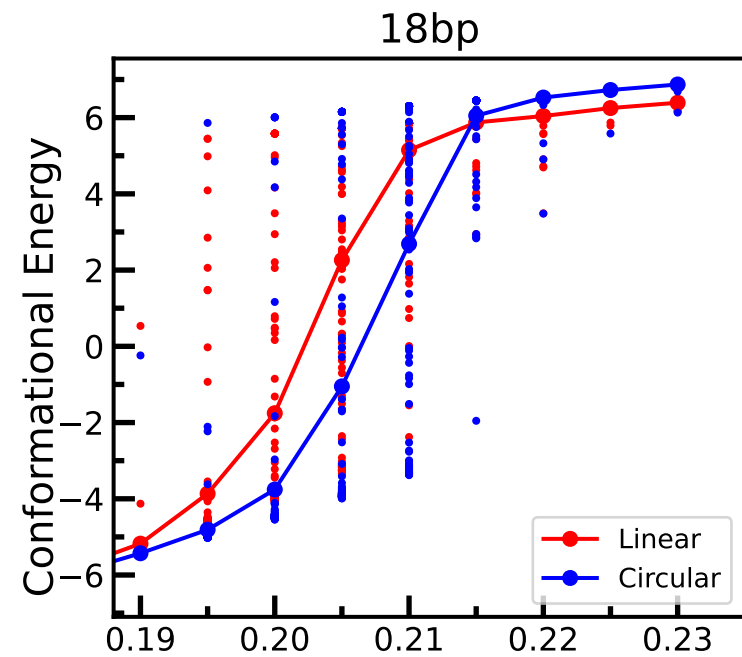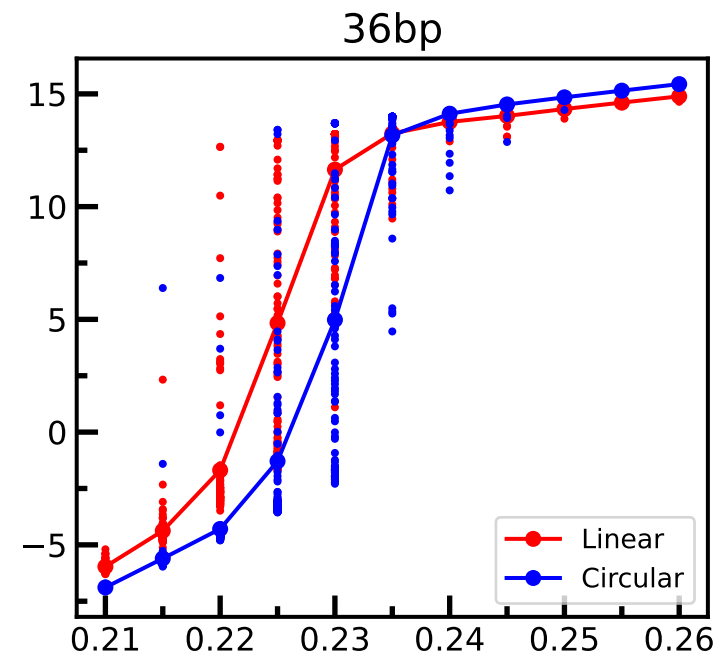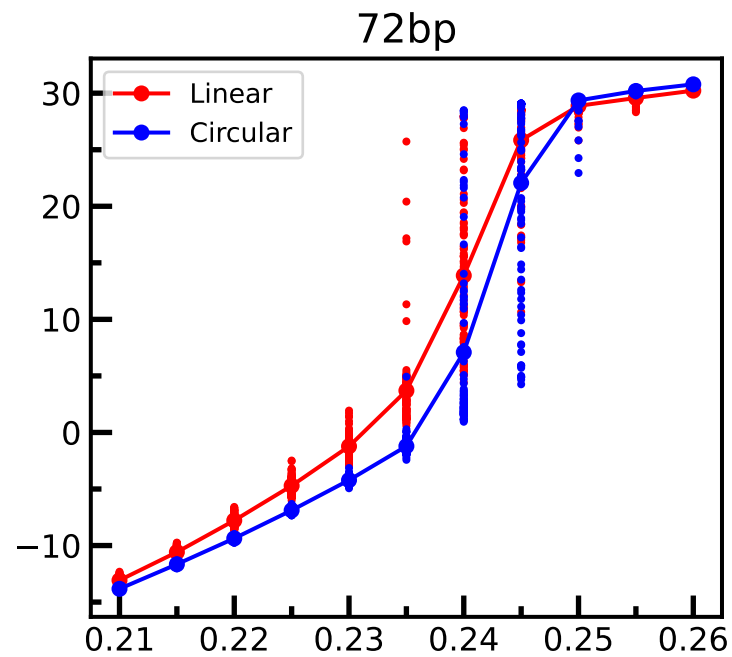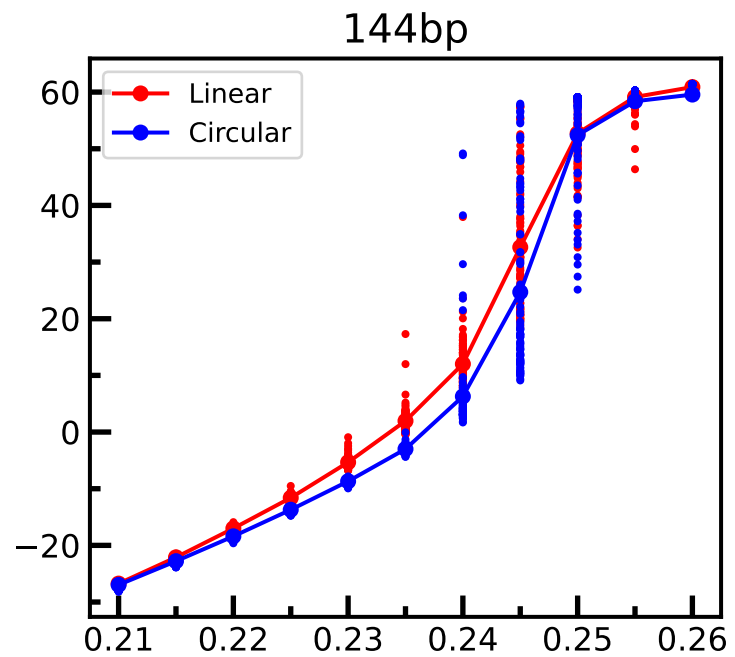

Temperature

Supplement: d4cp01536c1.zip [file d4cp01536c1.zip]

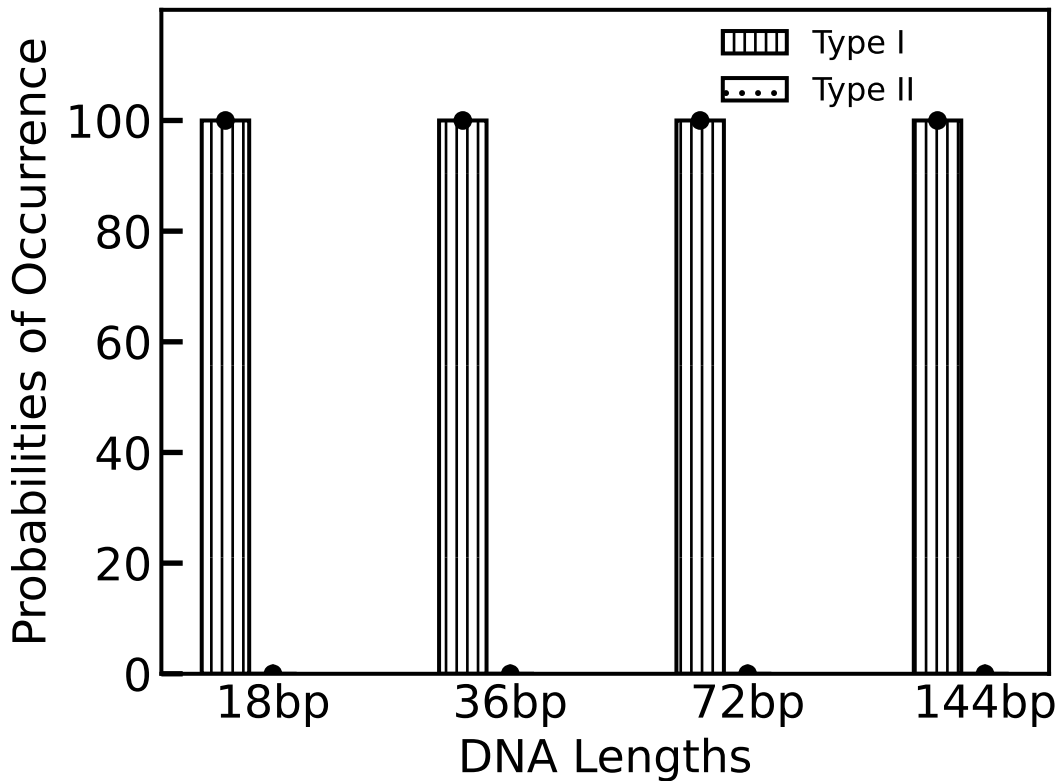

Supplement: d4cp01536c1.zip [file d4cp01536c1.zip]

18bp

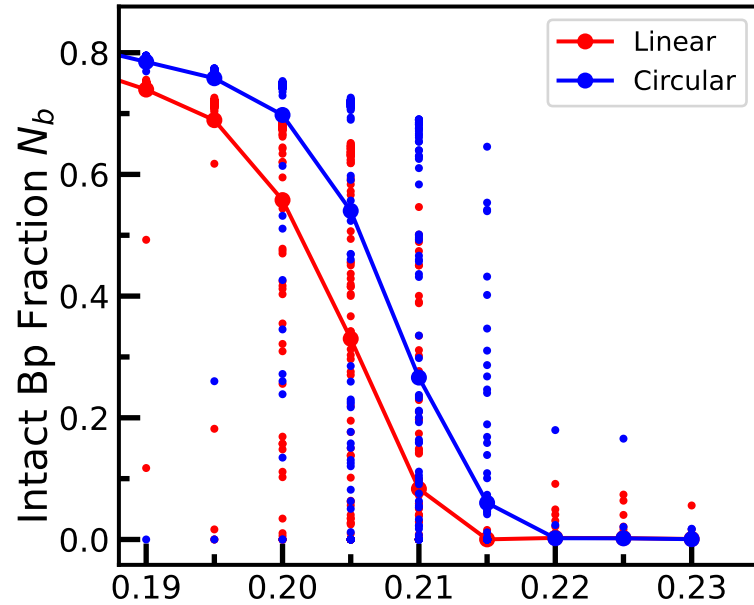

36bp

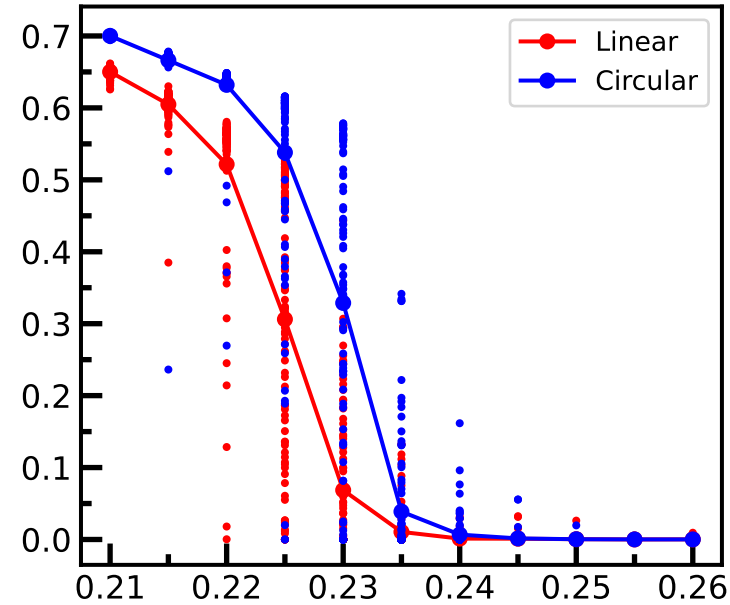

72bp

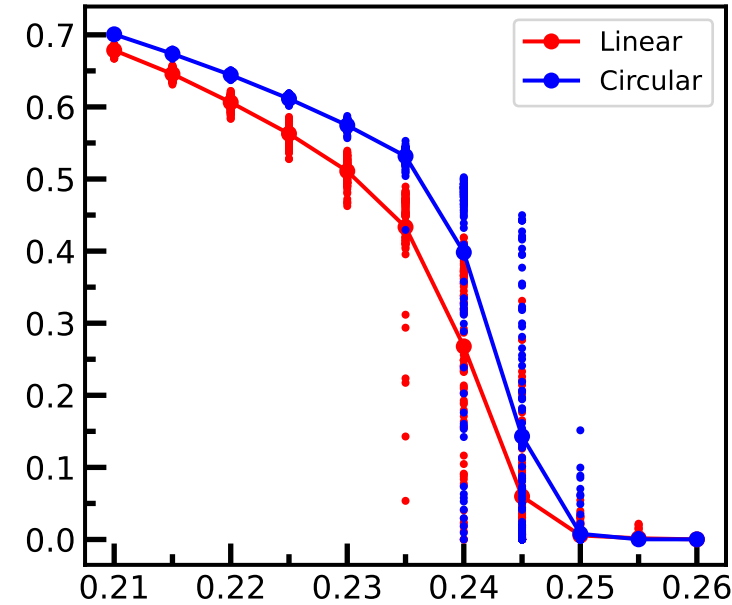

144bp

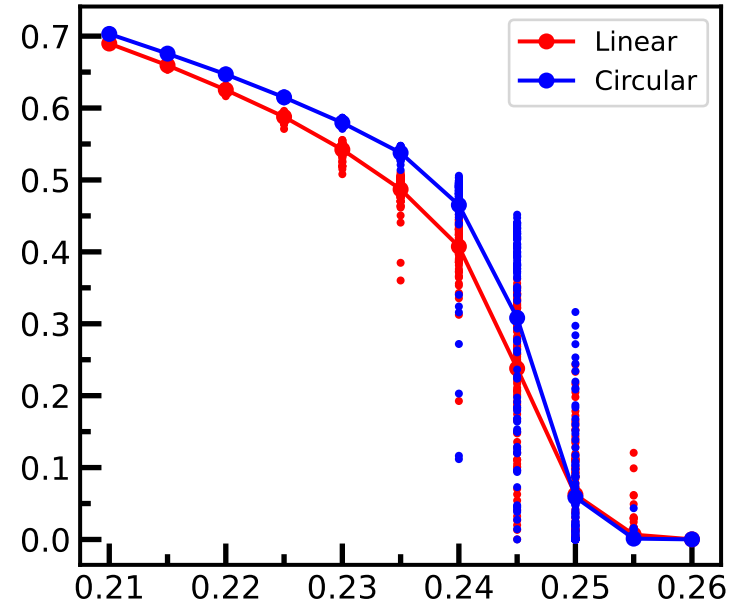

Temperature

Supplement: d4cp01536c1.zip [file d4cp01536c1.zip]
